# Supplementary material for: Identifying a miRNA signature for predicting the stage of breast cancer
Source: PubMed Central journal article supplement (PMC6208346; doi:10.1038/s41598-018-34604-3), 2018-10-31
Supplement: 41598_2018_34604_MOESM1_ESM.pdf [file 41598_2018_34604_MOESM1_ESM.pdf]

# **Identifying a miRNA signature for predicting the stage of breast cancer**

**Srinivasulu Yerukala Sathipati<sup>1</sup> and Shinn-Ying Ho<sup>1, 2, 3\*</sup>**

<sup>1</sup>Institute of Bioinformatics and Systems Biology, National Chiao Tung University, Hsinchu, Taiwan

<sup>2</sup>Department of Biological Science and Technology, National Chiao Tung University, Hsinchu, Taiwan

<sup>3</sup>Center For Intelligent Drug Systems and Smart Bio-devices (IDS2B), National Chiao Tung University, Hsinchu, Taiwan

\*Corresponding author

Email address:

SYH: [syho@mail.nctu.edu.tw](mailto:syho@mail.nctu.edu.tw)

# Supplementary Figures

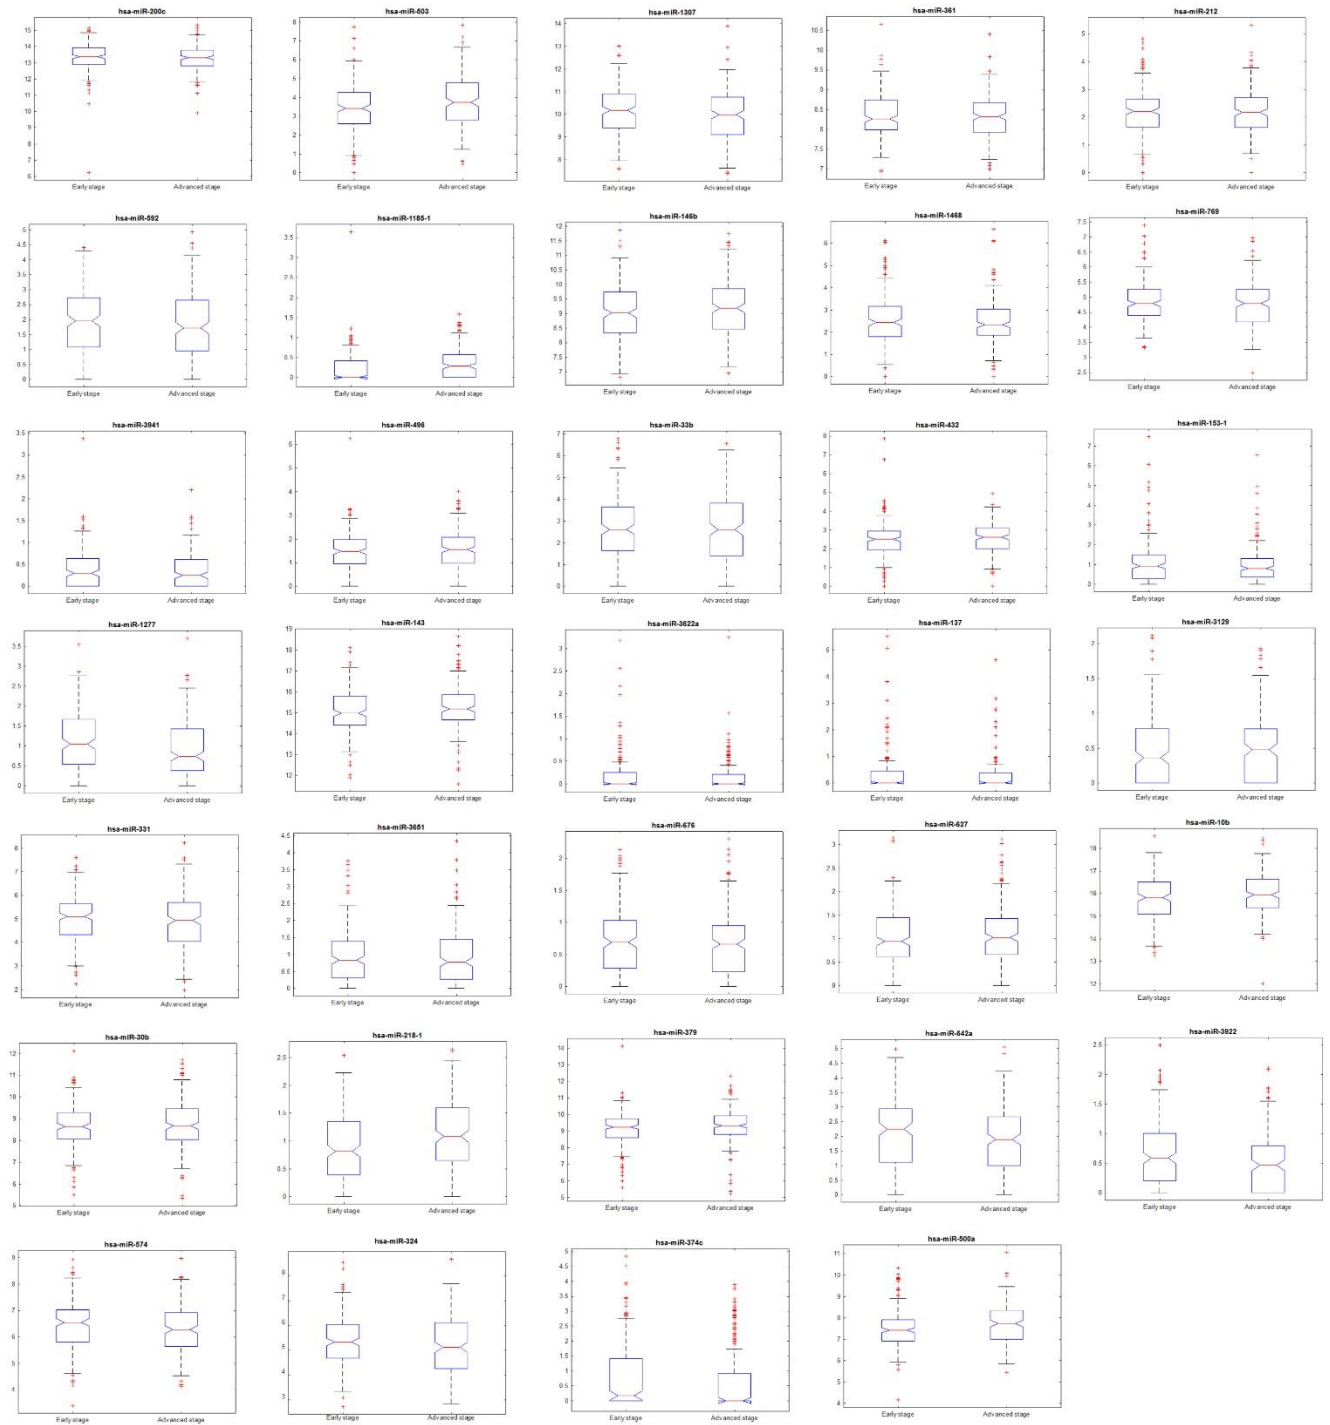

**Supplementary Figure 1.** Box-plot representation of expression difference between early stage and advanced stage groups.

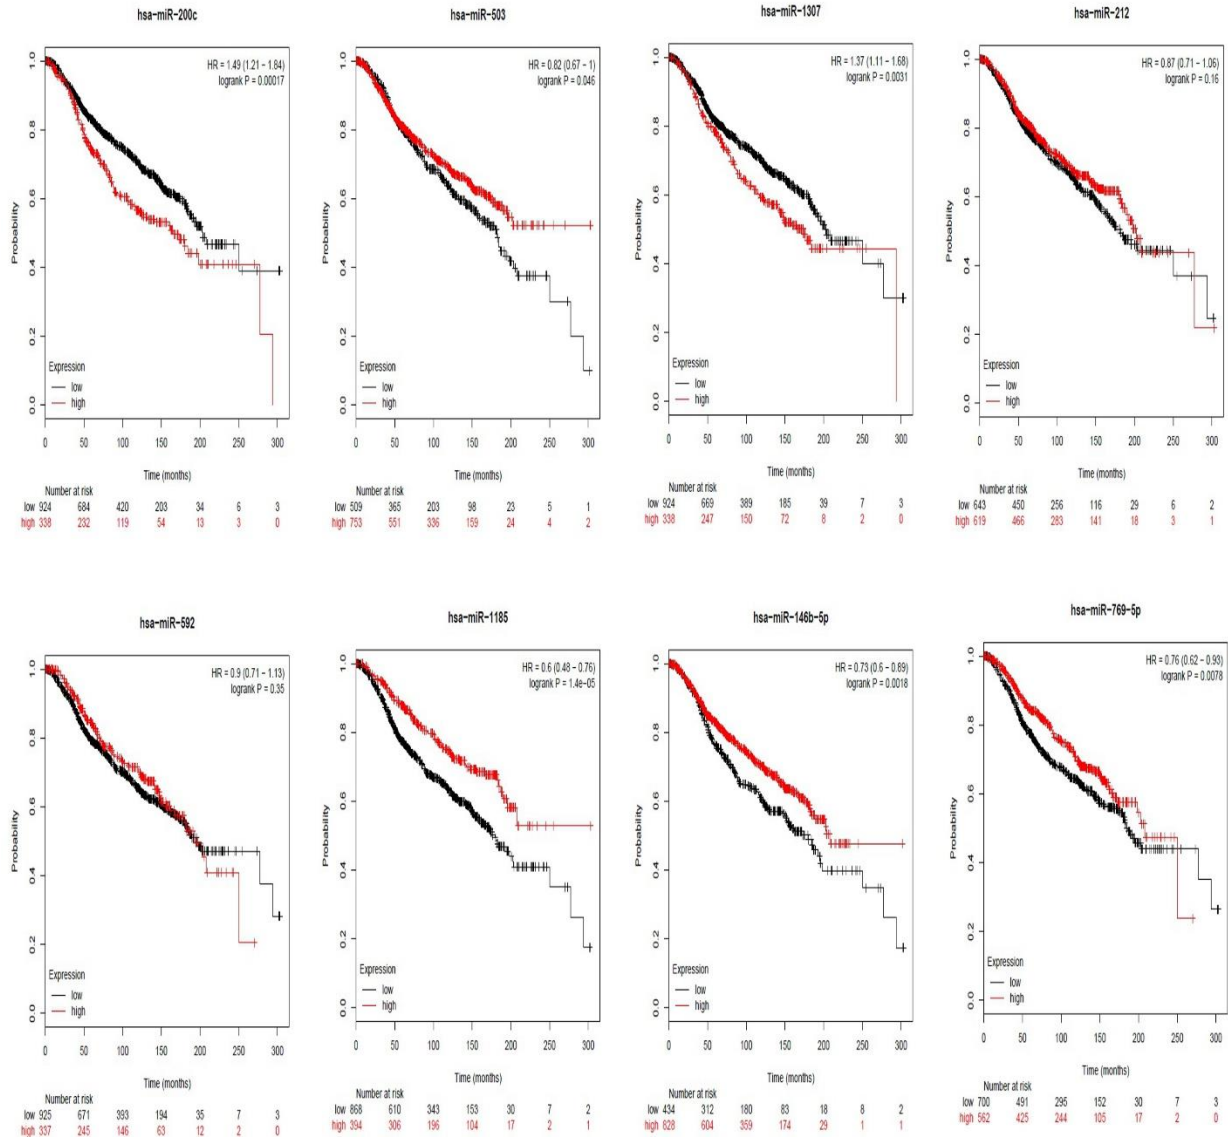

**Supplementary Figure 2.** Kaplan-Meier plots of eight highest ranked miRNAs for the systemically treated breast cancer cohort using the METABRIC dataset.

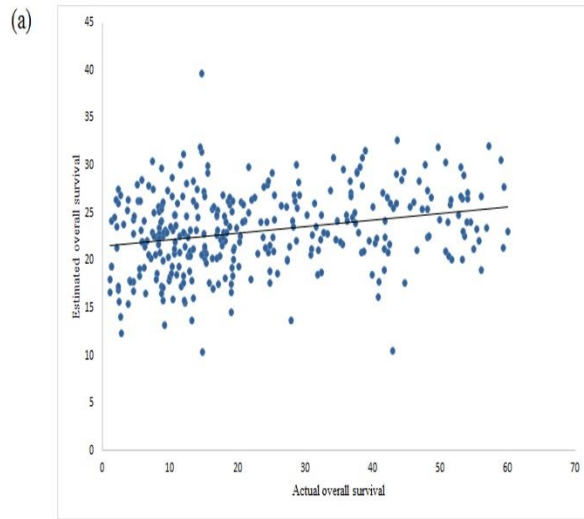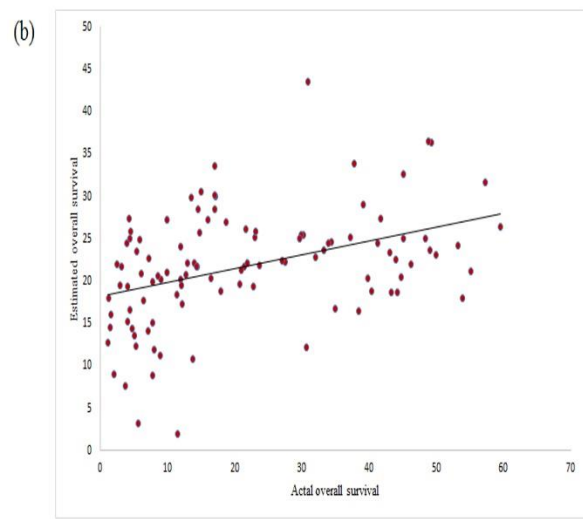

**Supplementary Figure 3.** Correlation plots for (a) early stage and (b) advanced stage groups. Actual overall survival is on X-axis and estimated overall survival is on Y-axis.

## Supplementary Tables

**Supplementary Table 1.** MiRNA ranking using MED scores and feature knockout analysis for 34 miRNAs.

| Rank | MiRNA          | MED score | Accuracy difference (%) |
|------|----------------|-----------|-------------------------|
| 1    | hsa-miR-200c   | 69.6891   | 20.99                   |
| 2    | hsa-miR-503    | 65.02589  | 20.73                   |
| 3    | hsa-miR-1307   | 48.44561  | 21.25                   |
| 4    | hsa-miR-361    | 47.92746  | 21.25                   |
| 5    | hsa-miR-212    | 46.89119  | 20.99                   |
| 6    | hsa-miR-592    | 46.89119  | 19.95                   |
| 7    | hsa-miR-1185.1 | 43.26424  | 20.72                   |
| 8    | hsa-miR-146b   | 43.26423  | 19.69                   |
| 9    | hsa-miR-1468   | 34.45598  | 21.25                   |
| 10   | hsa-miR-769    | 30.82902  | 20.47                   |
| 11   | hsa-miR-3941   | 30.31089  | 21.51                   |
| 12   | hsa-miR-496    | 25.64768  | 21.25                   |
| 13   | hsa-miR-33b    | 23.57513  | 21.51                   |
| 14   | hsa-miR-432    | 20.98445  | 22.03                   |
| 15   | hsa-miR-153.1  | 19.43005  | 19.43                   |
| 16   | hsa-miR-1277   | 16.32125  | 20.46                   |
| 17   | hsa-miR-143    | 12.69432  | 21.25                   |
| 18   | hsa-miR-3622a  | 12.69429  | 20.47                   |
| 19   | hsa-miR-137    | 11.1399   | 21.24                   |
| 20   | hsa-miR-3129   | 11.13989  | 20.99                   |
| 21   | hsa-miR-331    | 8.031063  | 20.21                   |
| 22   | hsa-miR-3651   | 6.476673  | 20.47                   |
| 23   | hsa-miR-676    | 5.440403  | 21.25                   |
| 24   | hsa-miR-627    | 4.40414   | 20.73                   |
| 25   | hsa-miR-10b    | -3.88601  | 20.98                   |
| 26   | hsa-miR-30b    | -8.03106  | 20.98                   |
| 27   | hsa-miR-218.1  | -8.03108  | 19.95                   |
| 28   | hsa-miR-379    | -12.6943  | 21.51                   |
| 29   | hsa-miR-642a   | -17.3575  | 20.47                   |
| 30   | hsa-miR-3922   | -17.8757  | 20.47                   |
| 31   | hsa-miR-574    | -30.3109  | 21.25                   |
| 32   | hsa-miR-324    | -31.3471  | 21.51                   |
| 33   | hsa-miR-374c   | -32.9016  | 20.21                   |
| 34   | hsa-miR-500a   | -82.1244  | 22.28                   |

**Supplementary Table 2.** Ten highest ranked miRNAs: enriched KEGG pathways.

| KEGG pathway | p-value | Genes |
|--------------|---------|-------|
|--------------|---------|-------|

|                                                            |           |    |
|------------------------------------------------------------|-----------|----|
| Fatty acid biosynthesis                                    | <1e-325   | 1  |
| Fatty acid metabolism                                      | <1e-325   | 3  |
| Adherens junction                                          | 4.471E-06 | 17 |
| Protein processing in endoplasmic reticulum                | 0.0008348 | 22 |
| Cytokine-cytokine receptor interaction                     | 0.0027675 | 1  |
| Bacterial invasion of epithelial cells                     | 0.0125597 | 14 |
| Spliceosome                                                | 0.0288454 | 19 |
| Proteoglycans in cancer                                    | 0.0366616 | 30 |
| Lysine degradation                                         | 0.0960024 | 6  |
| Biosynthesis of unsaturated fatty acids                    | 0.1327072 | 1  |
| Regulation of actin cytoskeleton                           | 0.1723914 | 20 |
| Colorectal cancer                                          | 0.2636787 | 3  |
| TGF-beta signaling pathway                                 | 0.3314428 | 7  |
| Signaling pathways regulating pluripotency of stem cells   | 0.4234695 | 10 |
| Endocrine and other factor-regulated calcium reabsorption  | 0.5073056 | 3  |
| Endocytosis                                                | 0.5451584 | 19 |
| Pathways in cancer                                         | 0.5528573 | 29 |
| Shigellosis                                                | 0.6166022 | 8  |
| p53 signaling pathway                                      | 0.629832  | 10 |
| MicroRNAs in cancer                                        | 0.652207  | 20 |
| ECM-receptor interaction                                   | 0.683408  | 6  |
| Cell cycle                                                 | 0.7913113 | 12 |
| Pyrimidine metabolism                                      | 0.8131436 | 3  |
| Glioma                                                     | 0.8151203 | 3  |
| Epstein-Barr virus infection                               | 0.8802326 | 13 |
| Transcriptional misregulation in cancer                    | 0.910793  | 15 |
| Epithelial cell signaling in Helicobacter pylori infection | 0.9118381 | 8  |
| Cysteine and methionine metabolism                         | 0.9707429 | 1  |
| Oxidative phosphorylation                                  | 0.978327  | 10 |
| Glycosaminoglycan degradation                              | 0.9919812 | 2  |
| SNARE interactions in vesicular transport                  | 0.9975946 | 2  |

**Supplementary Table 3.** The miRNA signature is commonly involved in biological pathways. Significance between each miRNA and pathway is measured in p-value.

| <b>KEGG pathway</b>     | <b>No.of miRNAs involved</b> | <b>Target genes</b> | <b>p-value</b> |
|-------------------------|------------------------------|---------------------|----------------|
| Proteoglycans in cancer | 28                           | 131                 | 1.03338E-13    |

|                                                                |    |     |             |
|----------------------------------------------------------------|----|-----|-------------|
| Hippo signaling pathway                                        | 25 | 98  | 2.13663E-09 |
| TGF-beta signaling pathway                                     | 25 | 56  | 1.0579E-06  |
| Axon guidance                                                  | 25 | 83  | 1.0579E-06  |
| ErbB signaling pathway                                         | 28 | 60  | 1.0579E-06  |
| Glioma                                                         | 25 | 44  | 2.62255E-06 |
| Signaling pathways<br>regulating pluripotency of<br>stem cells | 26 | 90  | 2.62255E-06 |
| Prion diseases                                                 | 18 | 17  | 9.55072E-06 |
| Thyroid hormone signaling<br>pathway                           | 27 | 72  | 1.92126E-05 |
| FoxO signaling pathway                                         | 25 | 85  | 2.01676E-05 |
| Pathways in cancer                                             | 30 | 229 | 2.97297E-05 |
| Morphine addiction                                             | 26 | 59  | 3.64208E-05 |
| Adrenergic signaling in<br>cardiomyocytes                      | 28 | 83  | 6.81057E-05 |
| Mucin type O-Glycan<br>biosynthesis                            | 21 | 17  | 7.46574E-05 |
| Focal adhesion                                                 | 29 | 123 | 0.000216734 |
| GABAergic synapse                                              | 24 | 49  | 0.000284817 |
| Long-term depression                                           | 26 | 40  | 0.000284817 |
| PI3K-Akt signaling<br>pathway                                  | 29 | 194 | 0.000284817 |
| Renal cell carcinoma                                           | 23 | 45  | 0.000337557 |
| Glycosaminoglycan<br>biosynthesis - keratan<br>sulfate         | 9  | 10  | 0.000626222 |
| Wnt signaling pathway                                          | 25 | 82  | 0.000626222 |
| Adherens junction                                              | 24 | 51  | 0.000829842 |
| Prostate cancer                                                | 26 | 56  | 0.001305499 |
| cAMP signaling pathway                                         | 28 | 115 | 0.001342091 |
| Circadian rhythm                                               | 20 | 24  | 0.001434471 |
| Transcriptional<br>misregulation in cancer                     | 27 | 102 | 0.001434471 |
| Rap1 signaling pathway                                         | 28 | 119 | 0.001434471 |
| Gap junction                                                   | 26 | 54  | 0.001458716 |
| Choline metabolism in<br>cancer                                | 25 | 65  | 0.002417336 |
| Endocytosis                                                    | 28 | 117 | 0.00347726  |
| Amphetamine addiction                                          | 25 | 39  | 0.004088877 |
| Melanogenesis                                                  | 27 | 61  | 0.004570773 |
| Chronic myeloid leukemia                                       | 23 | 45  | 0.004629624 |
| Pancreatic cancer                                              | 25 | 43  | 0.004629624 |

|                                                            |    |     |             |
|------------------------------------------------------------|----|-----|-------------|
| Retrograde endocannabinoid signaling                       | 26 | 61  | 0.004629624 |
| Dopaminergic synapse                                       | 28 | 78  | 0.004629624 |
| Ras signaling pathway                                      | 30 | 123 | 0.004629624 |
| Tight junction                                             | 24 | 76  | 0.004925457 |
| Endocrine and other factor-regulated calcium reabsorption  | 24 | 24  | 0.009556018 |
| Glutamatergic synapse                                      | 25 | 62  | 0.009571108 |
| mRNA surveillance pathway                                  | 23 | 53  | 0.011682309 |
| Biotin metabolism                                          | 3  | 2   | 0.012715888 |
| Glycosaminoglycan biosynthesis - heparan sulfate / heparin | 12 | 14  | 0.012715888 |
| Endometrial cancer                                         | 21 | 32  | 0.013348481 |
| Sphingolipid signaling pathway                             | 26 | 67  | 0.014036379 |
| Melanoma                                                   | 25 | 43  | 0.014555557 |
| mTOR signaling pathway                                     | 23 | 38  | 0.014981044 |
| Neurotrophin signaling pathway                             | 26 | 69  | 0.016222327 |
| Estrogen signaling pathway                                 | 28 | 57  | 0.016798557 |
| ECM-receptor interaction                                   | 20 | 46  | 0.019853927 |
| Acute myeloid leukemia                                     | 19 | 35  | 0.020859175 |
| Long-term potentiation                                     | 24 | 41  | 0.02214123  |
| Phosphatidylinositol signaling system                      | 24 | 49  | 0.023848905 |
| Colorectal cancer                                          | 24 | 38  | 0.023848905 |
| Hepatitis C                                                | 26 | 75  | 0.023848905 |
| cGMP-PKG signaling pathway                                 | 30 | 90  | 0.023848905 |
| MAPK signaling pathway                                     | 29 | 133 | 0.023950862 |
| Dorso-ventral axis formation                               | 15 | 19  | 0.027386726 |
| Lysine degradation                                         | 22 | 23  | 0.027450109 |
| T cell receptor signaling pathway                          | 24 | 60  | 0.027450109 |
| Measles                                                    | 25 | 72  | 0.027464695 |
| Non-small cell lung cancer                                 | 24 | 34  | 0.027660066 |
| Hedgehog signaling pathway                                 | 21 | 32  | 0.02918596  |
| Ubiquitin mediated proteolysis                             | 23 | 77  | 0.04169238  |
| Insulin signaling pathway                                  | 27 | 77  | 0.04169238  |



|                             |    |    |             |
|-----------------------------|----|----|-------------|
| Prolactin signaling pathway | 24 | 40 | 0.042307821 |
| Viral carcinogenesis        | 29 | 96 | 0.048261961 |

**Supplementary Table 4.** Ten highest ranked miRNAs signature: significantly enriched GO biological processes

| GO Category                                              | p-value     | Genes |
|----------------------------------------------------------|-------------|-------|
| mitotic cell cycle                                       | <1e-325     | 87    |
| cellular protein modification process                    | <1e-325     | 329   |
| viral process                                            | <1e-325     | 108   |
| small molecule metabolic process                         | <1e-325     | 287   |
| symbiosis, encompassing mutualism through parasitism     | <1e-325     | 119   |
| membrane organization                                    | <1e-325     | 113   |
| biosynthetic process                                     | <1e-325     | 528   |
| gene expression                                          | <1e-325     | 157   |
| cellular nitrogen compound metabolic process             | <1e-326     | 684   |
| catabolic process                                        | 8.32667E-15 | 225   |
| cellular component assembly                              | 5.4845E-14  | 190   |
| response to stress                                       | 6.42819E-14 | 242   |
| macromolecular complex assembly                          | 4.60354E-12 | 133   |
| nucleobase-containing compound catabolic process         | 1.16445E-11 | 131   |
| mRNA metabolic process                                   | 1.37178E-11 | 52    |
| RNA metabolic process                                    | 5.91699E-11 | 54    |
| neurotrophin TRK receptor signaling pathway              | 1.03916E-10 | 43    |
| cellular protein metabolic process                       | 4.97763E-09 | 73    |
| cellular lipid metabolic process                         | 3.64177E-07 | 30    |
| Fc-epsilon receptor signaling pathway                    | 4.46787E-07 | 29    |
| protein complex assembly                                 | 5.3846E-07  | 101   |
| DNA metabolic process                                    | 1.52289E-05 | 93    |
| cell death                                               | 2.56391E-05 | 123   |
| viral life cycle                                         | 5.18761E-05 | 24    |
| transcription, DNA-templated                             | 0.001133808 | 119   |
| epidermal growth factor receptor signaling pathway       | 0.002227821 | 25    |
| transcription initiation from RNA polymerase II promoter | 0.004062725 | 21    |
| G2/M transition of mitotic cell cycle                    | 0.004378806 | 23    |

**Supplementary Table 5.** Ten highest ranked miRNA signature: significantly enriched GO molecular functions.

| <b>GO Category</b>                                 | <b>p-value</b> | <b>Genes</b> |
|----------------------------------------------------|----------------|--------------|
| enzyme binding                                     | <1e-325        | 183          |
| molecular_function                                 | <1e-326        | 1638         |
| RNA binding                                        | <1e-327        | 315          |
| poly(A) RNA binding                                | <1e-328        | 262          |
| ion binding                                        | <1e-329        | 690          |
| protein binding transcription factor activity      | 1.031E-11      | 86           |
| nucleic acid binding transcription factor activity | 8.849E-06      | 101          |
| cytoskeletal protein binding                       | 0.0007619      | 68           |
| enzyme regulator activity                          | 0.0358469      | 67           |
| transcription factor binding                       | 0.0408334      | 42           |

**Supplementary Table 6.** Ten highest ranked miRNA signature: significantly enriched GO cellular components.

| <b>GO Category</b> | <b>p-value</b> | <b>Genes</b> |
|--------------------|----------------|--------------|
| cellular_component | <1e-325        | 1713         |
| protein complex    | <1e-325        | 517          |
| nucleoplasm        | <1e-325        | 227          |
| cytosol            | <1e-325        | 423          |
| organelle          | <1e-325        | 1299         |
| focal adhesion     | 0.0001166      | 49           |
